# Supplementary material for: Illuminating uveitis: metagenomic deep sequencing identifies common and rare pathogens
Source: PubMed Central journal article supplement (PMC4997733; doi:10.1186/s13073-016-0344-6), 2016-08-25
Supplement: 13073_2016_344_MOESM1_ESM.pdf [file 13073_2016_344_MOESM1_ESM.pdf]

| <b>Nucleotide Position</b>    | <b>Nucleotide Change</b> | <b>CDS Position</b> | <b>Codon Change</b> | <b>Amino Acid Change</b> |
|-------------------------------|--------------------------|---------------------|---------------------|--------------------------|
| <i>Non-Structural Protein</i> |                          |                     |                     |                          |
| 172                           | C -> T                   | 132                 | GCC -> GCT          |                          |
| 586                           | T -> C                   | 546                 | CGU -> CGC          |                          |
| 685                           | T -> C                   | 645                 | CAU -> CAC          |                          |
| 688                           | C -> T                   | 648                 | CUC -> CUT          |                          |
| 808                           | G -> A                   | 768                 | GGG -> GGA          |                          |
| 907                           | G -> T                   | 867                 | GUG -> GUT          |                          |
| 985                           | C -> T                   | 945                 | CUC -> CUT          |                          |
| 1,102                         | G -> C                   | 1,062               | GUG -> GUC          |                          |
| 1,156                         | G -> A                   | 1,116               | CUG -> CUA          |                          |
| 1,177                         | G -> C                   | 1,137               | ACG -> ACC          |                          |
| 1,252                         | C -> T                   | 1,212               | AUC -> AUT          |                          |
| 1,362                         | G -> A                   | 1,322               | CGC -> CAC          | R -> H                   |
| 1,399                         | C -> T                   | 1,359               | GCC -> GCT          |                          |
| 1,431                         | G -> A                   | 1,391               | CGC -> CAC          | R -> H                   |
| 1,558                         | A -> C                   | 1,518               | GAA -> GAC          | E -> D                   |
| 1,609                         | G -> T                   | 1,569               | CCG -> CCT          |                          |
| 1,618                         | C -> T                   | 1,578               | UUC -> UUT          |                          |
| 1,912                         | T -> C                   | 1,872               | CGU -> CGC          |                          |
| 2,008                         | C -> T                   | 1,968               | GGC -> GGT          |                          |
| 2,017                         | A -> G                   | 1,977               | GCA -> GCG          |                          |
| 2,053                         | A -> G                   | 2,013               | CCA -> CCG          |                          |
| 2,267                         | T -> C                   | 2,227               | UGC -> CGC          | C -> R                   |
| 2,301                         | C -> T                   | 2,261               | CCG -> CTG          | P -> L                   |
| 2,317                         | C -> T                   | 2,277               | CCC -> CCT          |                          |
| 2,363                         | T -> C                   | 2,323               | UCC -> CCC          | S -> P                   |
| 2,383                         | C -> T                   | 2,343               | CGC -> CGT          |                          |
| 2,404                         | G -> A                   | 2,364               | GAG -> GAA          |                          |
| 2,418                         | C -> G                   | 2,378               | CCG -> CGG          | P -> R                   |
| 2,473                         | T -> C                   | 2,433               | AGU -> AGC          |                          |
| 2,680                         | A -> G                   | 2,640               | ACA -> ACG          |                          |
| 2,719                         | G -> C                   | 2,679               | GCG -> GCC          |                          |
| 2,755                         | C -> G                   | 2,715               | CUC -> CUG          |                          |
| 2,767                         | A -> G                   | 2,727               | GAA -> GAG          |                          |
| 2,833                         | C -> T                   | 2,793               | GUC -> GUT          |                          |
| 2,933                         | A -> G                   | 2,893               | AGC -> GGC          | S -> G                   |
| 2,980                         | C -> T                   | 2,940               | UCC -> UCT          |                          |
| 3,008                         | C -> A                   | 2,968               | CGG -> AGG          |                          |
| 3,031                         | C -> T                   | 2,991               | ACC -> ACT          |                          |

|       |        |       |            |        |
|-------|--------|-------|------------|--------|
| 3,083 | A -> G | 3,043 | AGC -> GGC | S -> G |
| 3,250 | C -> A | 3,210 | CCC -> CCA |        |
| 3,442 | A -> G | 3,402 | ACA -> ACG |        |
| 3,445 | C -> T | 3,405 | GGC -> GGT |        |
| 3,496 | C -> T | 3,456 | UGC -> UGT |        |
| 3,520 | T -> C | 3,480 | GUU -> GUC |        |
| 3,666 | T -> C | 3,626 | CUU -> CCU | L -> P |
| 3,892 | C -> T | 3,852 | CGC -> CGT |        |
| 4,046 | T -> G | 4,006 | UCA -> GCA | S -> A |
| 4,102 | A -> G | 4,062 | GCA -> GCG |        |
| 4,117 | C -> T | 4,077 | ACC -> ACT |        |
| 4,216 | C -> T | 4,176 | AUC -> AUT |        |
| 4,231 | T -> C | 4,191 | GCU -> GCC |        |
| 4,333 | C -> G | 4,293 | GCC -> GCG |        |
| 4,348 | G -> A | 4,308 | GCG -> GCA |        |
| 4,363 | C -> G | 4,323 | GUC -> GUG |        |
| 4,444 | A -> G | 4,404 | UCA -> UCG |        |
| 4,453 | C -> T | 4,413 | ACC -> ACT |        |
| 4,484 | C -> T | 4,444 | CUG -> TUG |        |
| 4,504 | C -> T | 4,464 | UAC -> UAT |        |
| 4,570 | T -> C | 4,530 | CUU -> CUC |        |
| 4,681 | A -> G | 4,641 | GUA -> GUG |        |
| 5,119 | C -> T | 5,079 | GCC -> GCT |        |
| 5,188 | A -> G | 5,148 | CAA -> CAG |        |
| 5,428 | G -> A | 5,388 | GUG -> GUA |        |
| 5,584 | A -> G | 5,544 | CAA -> CAG |        |
| 5,593 | T -> C | 5,553 | GUU -> GUC |        |
| 5,638 | T -> C | 5,598 | GCU -> GCC |        |
| 5,725 | C -> T | 5,685 | AUC -> AUT |        |
| 5,944 | T -> C | 5,904 | GAU -> GAC |        |
| 5,956 | C -> T | 5,916 | UUC -> UUT |        |
| 6,028 | C -> T | 5,988 | AUC -> AUT |        |
| 6,058 | C -> T | 6,018 | CCC -> CCT |        |
| 6,208 | T -> A | 6,168 | GCU -> GCA |        |
| 6,235 | T -> A | 6,195 | GCU -> GCA |        |
| 6,286 | C -> T | 6,246 | CUC -> CUT |        |

***Non-coding Region***

|       |        |  |  |  |
|-------|--------|--|--|--|
| 6,398 | C -> T |  |  |  |
| 6,400 | C -> T |  |  |  |
| 6,405 | A -> G |  |  |  |
| 6,477 | A -> G |  |  |  |

|                                      |        |       |            |        |
|--------------------------------------|--------|-------|------------|--------|
| 6,478                                | C -> T |       |            |        |
| <b><i>Structural Polyprotein</i></b> |        |       |            |        |
| 6,518                                | T -> C | 9     | UCU -> UCC |        |
| 6,570                                | C -> T | 61    | CGC -> TGC | R -> C |
| 6,609                                | C -> T | 100   | CCG -> TCG | P -> S |
| 6,628                                | C -> T | 119   | CCG -> CTG | P -> L |
| 6,844                                | G -> A | 335   | GGG -> GAG | G -> E |
| 6,852                                | A -> G | 343   | AGC -> GGC | S -> G |
| 6,869                                | C -> T | 360   | CCC -> CCT |        |
| 6,875                                | G -> A | 366   | CUG -> CUA |        |
| 7,046                                | C -> T | 537   | ACC -> ACT |        |
| 7,055                                | C -> T | 546   | CUC -> CUT |        |
| 7,076                                | C -> T | 567   | GAC -> GAT |        |
| 7,114                                | C -> T | 605   | CCC -> CTC | P -> L |
| 7,214                                | C -> T | 705   | GGC -> GGT |        |
| 7,337                                | C -> T | 828   | AUC -> AUT |        |
| 7,379                                | C -> T | 870   | CUC -> CUT |        |
| 7,394                                | C -> T | 885   | GUC -> GUT |        |
| 7,414                                | T -> C | 905   | CUC -> CCC | L -> P |
| 7,447                                | C -> T | 938   | ACG -> ATG | T -> M |
| 7,450                                | T -> C | 941   | CUG -> CCG | L -> P |
| 7,485                                | G -> A | 976   | GGC -> AGC | G -> S |
| 7,523                                | C -> T | 1,014 | GAC -> GAT |        |
| 7,577                                | C -> G | 1,068 | GAC -> GAG | D -> E |
| 7,720                                | C -> T | 1,211 | CCU -> CTU | P -> L |
| 7,723                                | T -> C | 1,214 | UUC -> UCC | F -> S |
| 7,728                                | A -> T | 1,219 | ACC -> TCC | T -> S |
| 7,734                                | G -> A | 1,225 | GCG -> ACG | A -> T |
| 7,737                                | A -> G | 1,228 | AAC -> GAC | N -> D |
| 7,740                                | A -> G | 1,231 | ACC -> GCC | T -> A |
| 7,755                                | A -> G | 1,246 | ACC -> GCC | T -> A |
| 7,758                                | C -> T | 1,249 | CCC -> TCC | P -> S |
| 7,812                                | T -> G | 1,303 | UUU -> GUU | F -> V |
| 7,818                                | T -> C | 1,309 | UCU -> CCU | S -> P |
| 7,823                                | G -> A | 1,314 | GGG -> GGA |        |
| 7,925                                | C -> T | 1,416 | UGC -> UGT |        |
| 7,927                                | C -> T | 1,418 | GCU -> GTU | A -> V |
| 7,935                                | T -> C | 1,426 | UGG -> CGG | W -> R |
| 7,943                                | T -> C | 1,434 | CUU -> CUC |        |
| 8,004                                | G -> A | 1,495 | GUG -> AUG | V -> M |
| 8,037                                | C -> T | 1,528 | CUG -> TUG |        |

|       |        |       |            |        |
|-------|--------|-------|------------|--------|
| 8,060 | G -> C | 1,551 | GCG -> GCC |        |
| 8,114 | C -> T | 1,605 | CUC -> CUT |        |
| 8,166 | G -> A | 1,657 | GUG -> AUG | V -> M |
| 8,264 | C -> G | 1,755 | GCC -> GCG |        |
| 8,326 | C -> T | 1,817 | GCU -> GTU | A -> V |
| 8,420 | C -> T | 1,911 | ACC -> ACT |        |
| 8,456 | C -> T | 1,947 | CCC -> CCT |        |
| 8,516 | C -> T | 2,007 | GUC -> GUT |        |
| 8,531 | T -> A | 2,022 | UCU -> UCA |        |
| 8,546 | A -> G | 2,037 | CAA -> CAG |        |
| 8,555 | T -> G | 2,046 | UCU -> UCG |        |
| 8,567 | T -> C | 2,058 | CCU -> CCC |        |
| 8,624 | C -> T | 2,115 | UUC -> UUT |        |
| 8,630 | C -> T | 2,121 | CAC -> CAT |        |
| 8,659 | C -> G | 2,150 | ACC -> AGC | T -> S |
| 8,711 | C -> T | 2,202 | CAC -> CAT |        |
| 8,762 | C -> T | 2,253 | CUC -> CUT |        |
| 8,807 | C -> T | 2,298 | UUC -> UUT |        |
| 8,819 | G -> A | 2,310 | CCG -> CCA |        |
| 8,849 | C -> T | 2,340 | CCC -> CCT |        |
| 8,877 | A -> T | 2,368 | AUG -> TUG | M -> L |
| 9,092 | C -> T | 2,583 | GUC -> GUT |        |
| 9,152 | T -> C | 2,643 | GCU -> GCC |        |
| 9,218 | C -> T | 2,709 | CCC -> CCT |        |
| 9,251 | A -> G | 2,742 | GUA -> GUG |        |
| 9,375 | G -> C | 2,866 | GGC -> CGC | G -> R |
| 9,414 | A -> G | 2,905 | ACC -> GCC | T -> A |
| 9,434 | T -> C | 2,925 | ACU -> ACC |        |
| 9,447 | C -> G | 2,938 | CAA -> GAA | Q -> E |
| 9,620 | C -> T | 3,111 | AUC -> AUT |        |

***Non-coding Region***

|       |        |  |  |  |
|-------|--------|--|--|--|
| 9,725 | T -> C |  |  |  |
|-------|--------|--|--|--|
